# Supplementary material
Source: Springer Nature journal article supplement (https://www.springermedizin.de/resource/supplementary/12879_2009_831_MOESM1_ESM.pdf/9449880)

Nil

TB Antigen

Mitogen

Least Square Means

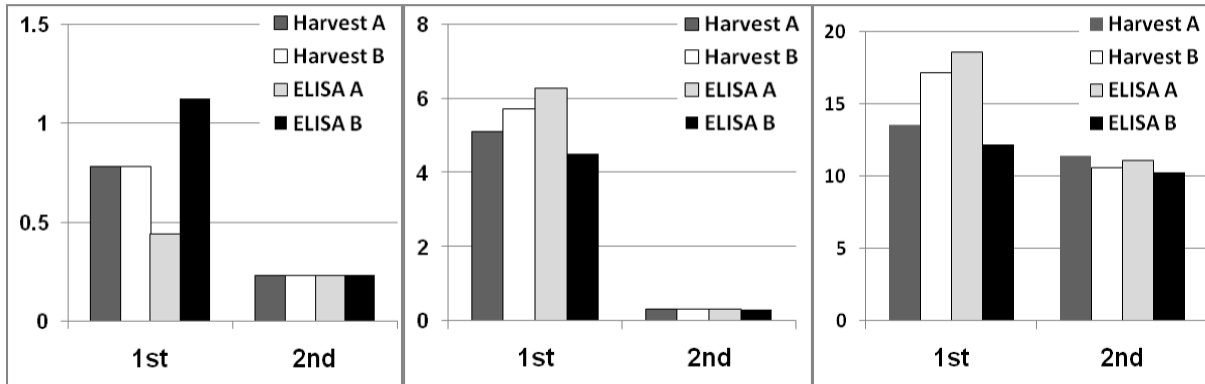

Supplement: MOESM1 [file 9449880]
